# Supplementary material
Source: publisher figshare collection journal article supplement (https://gsapubs.figshare.com/articles/dataset/_/12532076)
Supplement: Supplementary file 1 [file 1]

# Supplementary Information

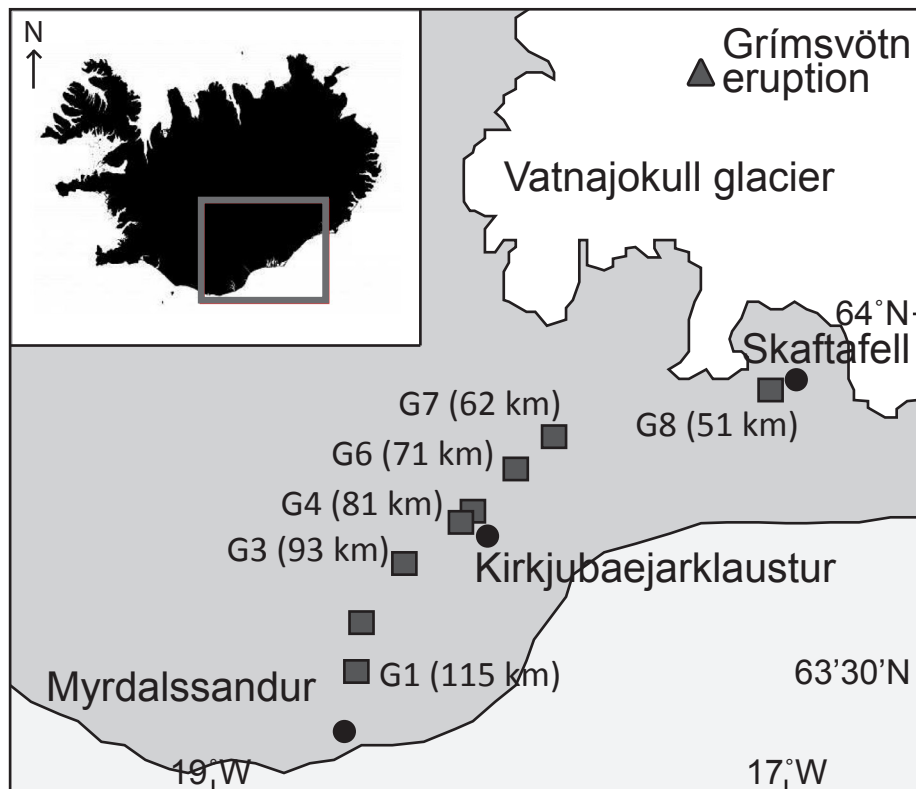

Supplementary information, Figure S1. Location map showing the 2011 vent (triangle) and sampling sites along the dispersal axis (squares). Coordinates given in Olsson et al., (2013). Samples used in this study are labelled with their distance from the vent.

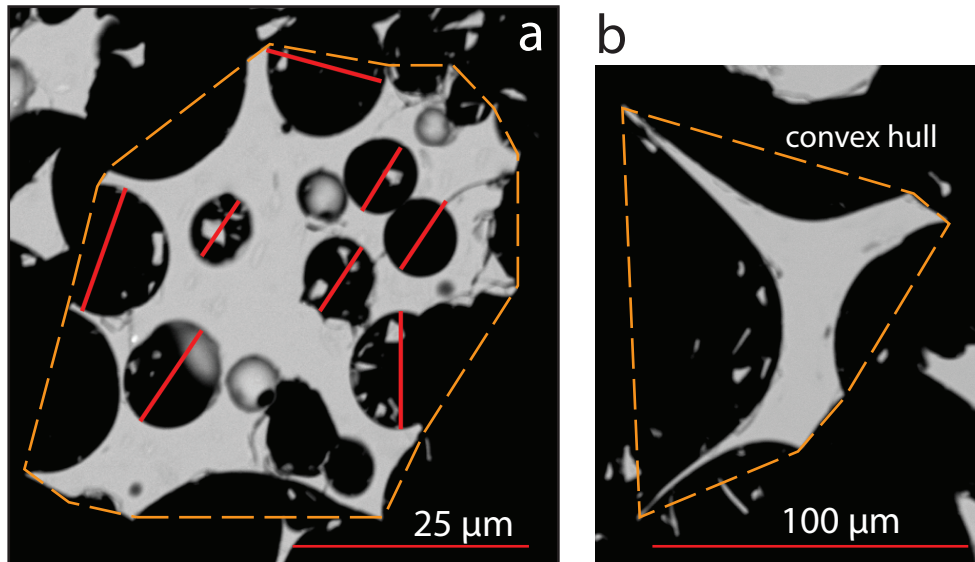

Supplementary information, Figure S2. A: measurement of vesicle diameters. We determined the maximum dimension (red lines) of 250 bubbles per size fraction from BSE grid images, including all vesicles  $>2\text{ }\mu\text{m}$  that preserved at least 50% of the bubble wall. B: The smooth concave curvature on even the largest shards provides evidence of some larger vesicles that are not captured by our measured VSD. The dashed orange lines illustrate the convex hull for the two particles shown in A and B. The convex hull perimeter is like stretching an elastic band around a particle, and is equivalent to the particle outline for a fully convex shape.

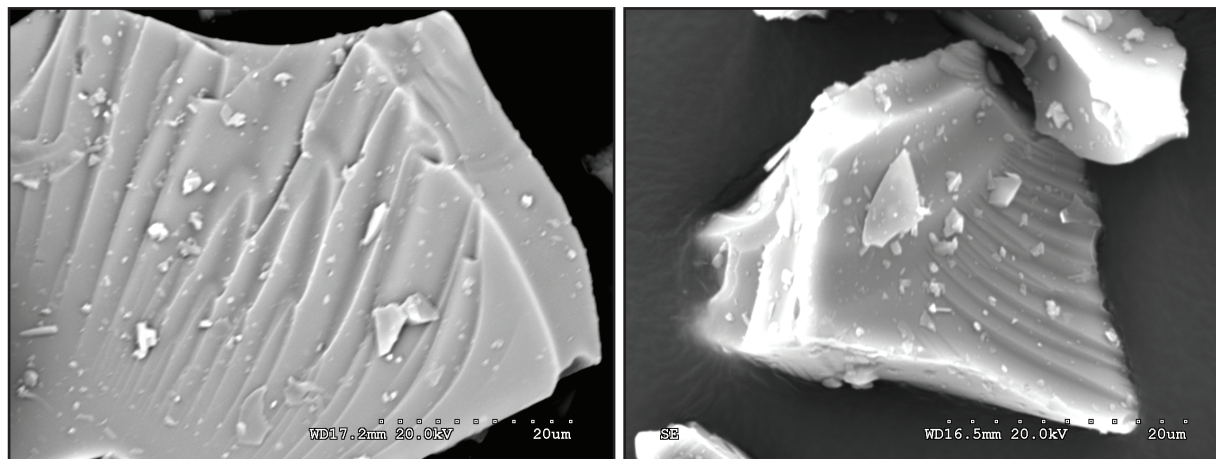

Supplementary Figure S3. Surface fracture patterns (river-lines), resulting from brittle fragmentation under mixed-mode stresses (Hull, 1999).

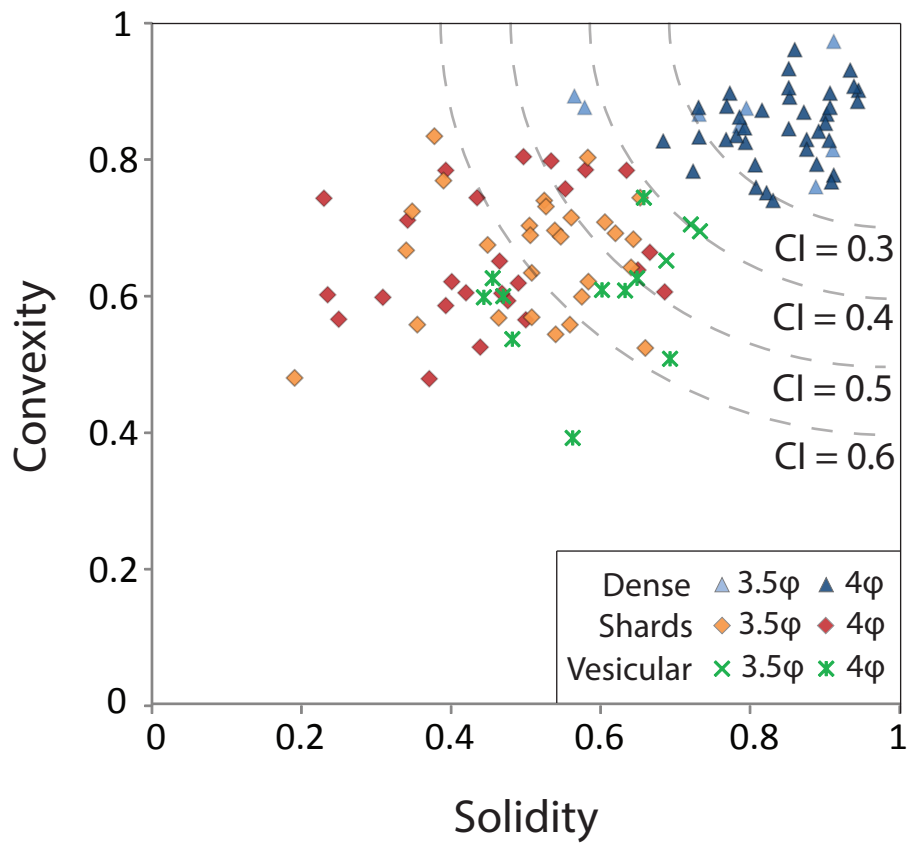

Supplementary information, Figure S4. Origin of the *concavity index*, ( $CI$ ; Eq. 1). Solidity ( $S$ ) and convexity ( $C$ ) values are shown for a subsample of ash particles from G6 and G1 ( $<3.5\phi$  and  $4\phi$ ).  $CI$  is the magnitude of the vector from a perfect circle ( $S=C=1$ ). The dashed lines show  $CI$  contours.

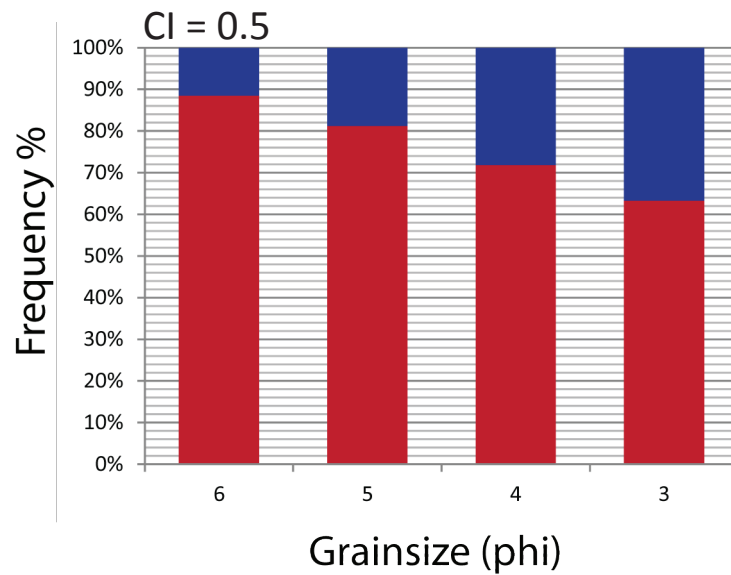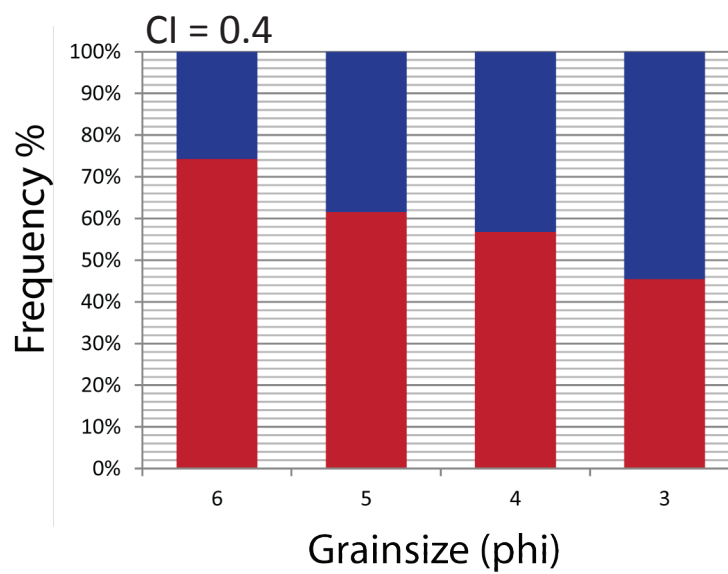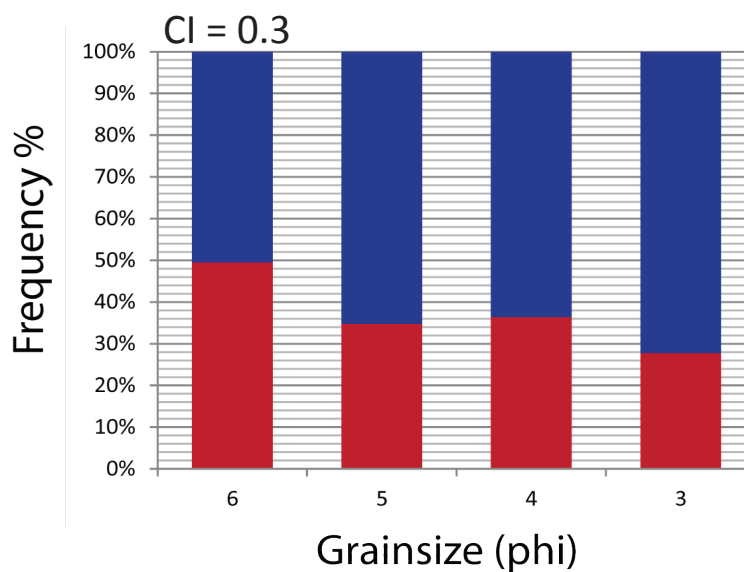

Supplementary information, Figure S5. Sensitivity of automated componentry to *CI* threshold. Manual componentry shown in Figure 3 for comparison. Red and blue bars correspond to dense fragments and bubbly grains (vesicular particles and shards), respectively.

## 2D Number frequency (%)

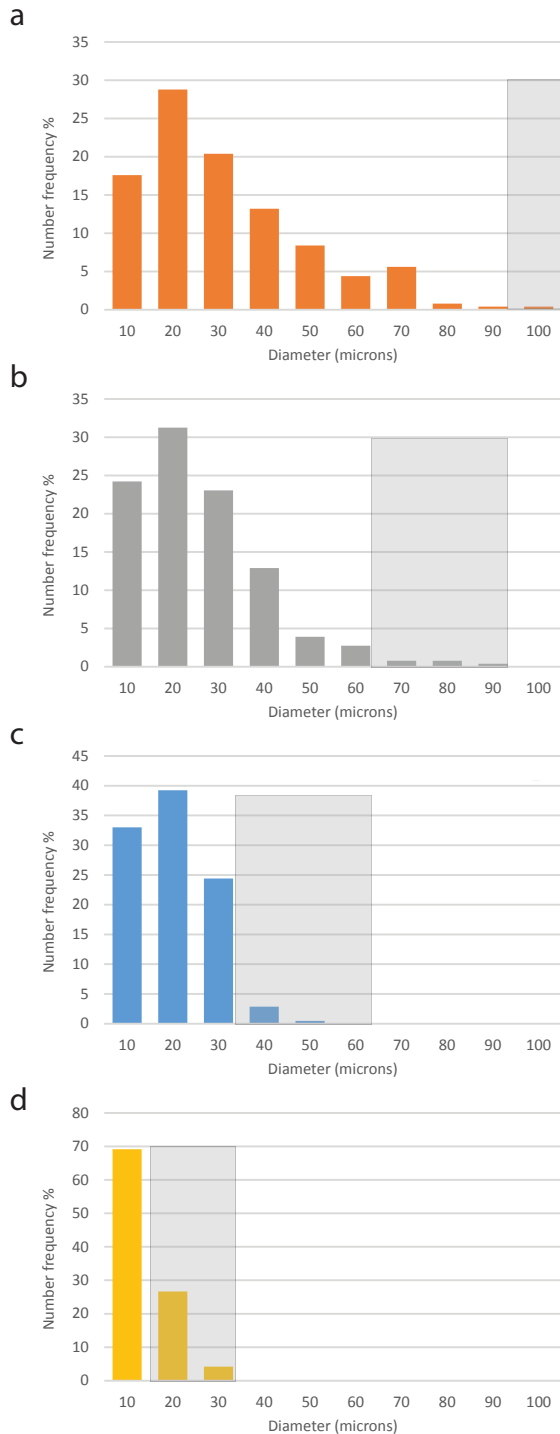

Supplementary information, Figure S6. A-D: Comparison of 2D number frequency of bubble diameters recorded by each ash size fraction (shaded regions indicate size range of particles). The distribution preserved in the coarsest ash fraction does not appear to be truncated, and therefore provides a representative measure of the lower end of the bubble size distribution. E: 3D bubble volume distributions recorded by each ash size class. Distributions are shown as percentages of the total bubble volume. For smaller size classes (4, 5 and 6 phi), distributions are shown as percentages of the total volume of bubbles smaller than the maximum grain size in each size class. Line colours refer to the same particle size classes as shown in A-D.

## 3D Volume Distribution

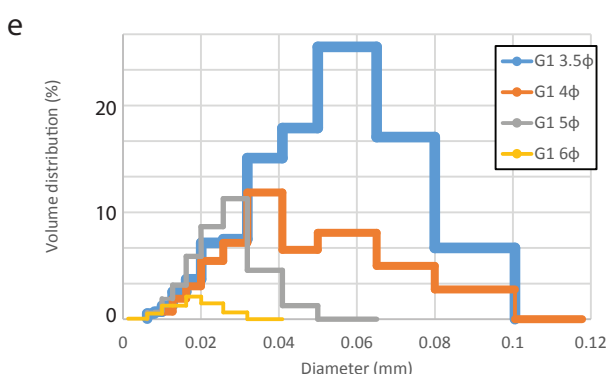

## Supplementary Information

**Table S1:** Table S1: EPMA glass analyses of ash grains (1 analysis per particle) from the 3 $\phi$  size fraction of G1 (analyses 1–15) and G6 (analyses 16–28) Grimsvötn samples (22 May 2011).

| Analysis No. | SiO <sub>2</sub> | TiO <sub>2</sub> | Al <sub>2</sub> O <sub>3</sub> | FeO    | MnO   | MgO   | CaO    | Na <sub>2</sub> O | K <sub>2</sub> O | P <sub>2</sub> O <sub>5</sub> | SO <sub>2</sub> | Cl    | Total   |
|--------------|------------------|------------------|--------------------------------|--------|-------|-------|--------|-------------------|------------------|-------------------------------|-----------------|-------|---------|
| 1            | 51.393           | 2.879            | 13.458                         | 13.412 | 0.147 | 5.322 | 9.938  | 1.749             | 0.524            | 0.324                         | 0.082           | 0.004 | 99.233  |
| 2            | 50.058           | 2.875            | 12.727                         | 13.657 | 0.246 | 5.717 | 9.903  | 2.854             | 0.481            | 0.342                         | 0.101           | 0.030 | 98.992  |
| 3            | 49.907           | 3.010            | 13.113                         | 13.722 | 0.255 | 4.895 | 9.506  | 2.876             | 0.538            | 0.358                         | 0.094           | 0.024 | 98.298  |
| 4            | 51.277           | 2.621            | 13.610                         | 13.167 | 0.243 | 5.606 | 10.218 | 3.247             | 0.587            | 0.309                         | 0.174           | 0.012 | 101.071 |
| 5            | 50.768           | 3.025            | 12.841                         | 14.127 | 0.228 | 4.938 | 9.432  | 2.773             | 0.546            | 0.328                         | 0.112           | 0.006 | 99.122  |
| 6            | 50.311           | 2.670            | 13.422                         | 12.793 | 0.239 | 5.550 | 10.081 | 2.772             | 0.497            | 0.353                         | 0.101           | 0.009 | 98.799  |
| 7            | 50.631           | 2.708            | 13.403                         | 13.010 | 0.202 | 5.327 | 9.958  | 2.816             | 0.473            | 0.313                         | 0.082           | 0.019 | 98.942  |
| 8            | 50.557           | 3.094            | 12.996                         | 14.315 | 0.217 | 4.979 | 9.507  | 2.883             | 0.523            | 0.306                         | 0.120           | 0.029 | 99.528  |
| 9            | 50.314           | 2.660            | 13.479                         | 13.041 | 0.166 | 5.685 | 9.796  | 2.625             | 0.430            | 0.306                         | 0.114           | 0.006 | 98.622  |
| 10           | 51.001           | 2.638            | 13.519                         | 12.593 | 0.287 | 5.529 | 10.010 | 2.499             | 0.463            | 0.282                         | 0.066           | 0.020 | 98.908  |
| 11           | 50.296           | 2.593            | 13.267                         | 13.064 | 0.298 | 5.662 | 10.061 | 2.882             | 0.452            | 0.327                         | 0.149           | 0.017 | 99.068  |
| 12           | 49.606           | 2.978            | 12.816                         | 14.403 | 0.238 | 5.165 | 9.885  | 2.980             | 0.508            | 0.355                         | 0.129           | 0.009 | 99.073  |
| 13           | 50.156           | 2.701            | 13.414                         | 12.833 | 0.164 | 5.569 | 10.017 | 2.668             | 0.430            | 0.297                         | 0.100           | 0.021 | 98.369  |
| 14           | 49.730           | 2.859            | 13.158                         | 13.759 | 0.138 | 5.377 | 9.966  | 2.449             | 0.544            | 0.328                         | 0.132           | 0.026 | 98.466  |
| 15           | 50.315           | 3.086            | 12.972                         | 14.474 | 0.214 | 5.088 | 9.587  | 2.685             | 0.528            | 0.307                         | 0.080           | 0.031 | 99.366  |
| 16           | 49.989           | 3.043            | 12.992                         | 13.419 | 0.199 | 5.262 | 9.975  | 3.144             | 0.471            | 0.294                         | 0.108           | 0.019 | 98.916  |
| 17           | 50.792           | 3.164            | 12.640                         | 14.507 | 0.233 | 4.980 | 9.573  | 2.839             | 0.512            | 0.358                         | 0.147           | 0.014 | 99.758  |
| 18           | 49.696           | 2.993            | 13.044                         | 14.023 | 0.269 | 5.126 | 9.663  | 2.979             | 0.486            | 0.358                         | 0.169           | 0.034 | 98.840  |
| 19           | 50.067           | 2.812            | 13.168                         | 13.440 | 0.199 | 5.348 | 9.824  | 2.631             | 0.428            | 0.397                         | 0.107           | 0.022 | 98.442  |
| 20           | 50.027           | 2.827            | 13.325                         | 13.122 | 0.223 | 5.436 | 9.994  | 2.670             | 0.420            | 0.306                         | 0.144           | 0.000 | 98.496  |



|      |        |       |        |        |       |       |        |       |       |       |       |       |        |
|------|--------|-------|--------|--------|-------|-------|--------|-------|-------|-------|-------|-------|--------|
| 21   | 49.594 | 3.070 | 12.730 | 14.247 | 0.241 | 5.217 | 9.509  | 2.902 | 0.476 | 0.349 | 0.139 | 0.023 | 98.498 |
| 22   | 50.304 | 2.859 | 12.927 | 13.849 | 0.324 | 5.444 | 9.750  | 3.103 | 0.429 | 0.341 | 0.161 | 0.022 | 99.512 |
| 23   | 50.101 | 2.745 | 13.356 | 13.070 | 0.267 | 5.530 | 9.782  | 2.715 | 0.507 | 0.344 | 0.096 | 0.014 | 98.525 |
| 24   | 49.750 | 3.295 | 12.312 | 14.902 | 0.310 | 4.876 | 9.682  | 2.933 | 0.545 | 0.447 | 0.045 | 0.021 | 99.121 |
| 25   | 51.370 | 1.958 | 14.198 | 11.438 | 0.188 | 5.702 | 10.317 | 2.884 | 0.483 | 0.249 | 0.047 | 0.000 | 98.833 |
| 26   | 49.898 | 2.835 | 13.137 | 13.458 | 0.218 | 5.098 | 9.899  | 2.885 | 0.515 | 0.318 | 0.089 | 0.011 | 98.360 |
| 27   | 52.236 | 2.028 | 14.230 | 11.528 | 0.146 | 5.235 | 9.865  | 2.723 | 0.497 | 0.308 | 0.069 | 0.028 | 98.894 |
| 28   | 49.928 | 3.058 | 13.147 | 13.980 | 0.166 | 5.191 | 9.915  | 2.904 | 0.505 | 0.391 | 0.114 | 0.004 | 99.302 |
| Mean | 50.439 | 2.642 | 14.322 | 12.646 | 0.212 | 4.974 | 10.106 | 2.843 | 0.464 | 0.311 | 0.102 | 0.017 |        |
| SD   | 0.753  | 0.750 | 4.321  | 3.261  | 0.066 | 1.327 | 1.034  | 0.366 | 0.115 | 0.088 | 0.043 | 0.009 |        |
| SE   | 0.137  | 0.137 | 0.789  | 0.595  | 0.012 | 0.242 | 0.189  | 0.067 | 0.021 | 0.016 | 0.008 | 0.002 |        |

**Table S2:** Number of particles analysed per size fraction for automated componentry.

Automated BSE grid images, each containing 1159–3769 particles in 20–40 images, were acquired for each sample size fraction, with the acquisition magnification set for a minimum resolution of 500 pixels/particle; the average resolution for all size fractions is 2211 pixels/particle. High resolution (average ~20,000 pixels/particle;  $\leq 81$  images) grids of samples G6 (3.5 $\phi$  and 4 $\phi$ ) and G1 (4 $\phi$ ) allowed us to test the sensitivity of the shape parameters to image resolution. All images were obtained using a Hitachi S-3500N SEM at the University of Bristol, UK.

| Sample | 3.5 $\phi$ | 4 $\phi$ | 5 $\phi$ | 6 $\phi$ |
|--------|------------|----------|----------|----------|
| G1     | 1157       | 2674     | 2687     | 2423     |
| G3     | 2439       | 1489     | 1578     | 1489     |
| G4     | 1828       | 1398     | 1086     | 1220     |
| G6     | 1159       | 1267     | 2570     | 2873     |
| G7     | 2628       | 1219     | 1902     | 2249     |
| G8     | 2691       | 1424     | 1425     | 1625     |

**Table S3:** Grain size distribution data tables. This file contains the raw data and corresponding references for the grain size distributions shown in Figure 1.

**Additional references for supplementary information:**

Andronico, D., Scollo, S., Lo Castro, M. D., Cristaldi, A., Lodato, L., & Taddeucci, J., 2014b, Eruption dynamics and tephra dispersal from the 24 November 2006 paroxysm at

South-East Crater, Mt Etna, Italy: *Journal of Volcanology and Geothermal Research*, 274, 78-91.

Andronico, D., Scollo, S., Cristaldi, A., & Castro, M. D. L., 2014a, Representivity of incompletely sampled fall deposits in estimating eruption source parameters: a test using the 12–13 January 2011 lava fountain deposit from Mt. Etna volcano, Italy: *Bulletin of Volcanology*, 76(10), 1-14.

Büttner, R., Dellino, P., Raue, H., Sonder, I., & Zimanowski, B., 2006, Stress-induced brittle fragmentation of magmatic melts: Theory and experiments: *Journal of Geophysical Research: Solid Earth* (1978–2012), 111(B8).

Houghton, B.F., & Hackett, W.R., 1984, Strombolian and phreatomagmatic deposits of Ohakune Craters, Ruapehu, New Zealand: a complex interaction between external water and rising basaltic magma: *Journal of volcanology and geothermal research*, 21(3), 207-231.

Houghton, B.F., & Nairn, I.A., 1991, The 1976–1982 Strombolian and phreatomagmatic eruptions of White Island, New Zealand: eruptive and depositional mechanisms at a ‘wet’ volcano: *Bulletin of volcanology*, 54(1), 25-49.

Jude-Eton, T. C., Thordarson, T., Gudmundsson, M. T., & Oddsson, B., 2012, Dynamics, stratigraphy and proximal dispersal of supraglacial tephra during the ice-confined 2004 eruption at Grímsvötn Volcano, Iceland: *Bulletin of volcanology*, 74(5), 1057-1082.

Mannen, K., 2006, Total grain size distribution of a mafic subplinian tephra, TB-2, from the 1986 Izu-Oshima eruption, Japan: An estimation based on a theoretical model of tephra dispersal: *Journal of volcanology and geothermal research*, 155(1), 1-17.

Mastin, L.G., Spieler, O., & Downey, W.S., 2009, An experimental study of hydromagmatic fragmentation through energetic, non-explosive magma–water mixing: *Journal of Volcanology and Geothermal Research*, 180(2), 161-170.

Németh, K., & Cronin, S.J., 2011, Drivers of explosivity and elevated hazard in basaltic fissure eruptions: the 1913 eruption of Ambrym Volcano, Vanuatu (SW-Pacific): *Journal of volcanology and geothermal research*, 201(1), 194-209.

Olsson, J., Stipp, S.L.S., Dalby, K.N., & Gislason, S.R., 2013, Rapid release of metal salts and nutrients from the 2011 Grímsvötn, Iceland volcanic ash: *Geochimica et Cosmochimica Acta*, 123, 134-149.

Parfitt, E.A., 1998, A study of clast size distribution, ash deposition and fragmentation in a Hawaiian-style volcanic eruption: *Journal of Volcanology and Geothermal Research*, 84(3), 197-208.

Porritt, L. A., Russell, J.K., & Quane, S.L., 2012, Pele's tears and spheres: Examples from Kilauea Iki: *Earth and Planetary Science Letters*, 333, 171-180.

Rose, W.I., Bonis, S., Stoiber, R.E., Keller, M., & Bickford, T., 1973, Studies of volcanic ash from two recent Central American eruptions: *Bulletin Volcanologique*, 37(3), 338-364

Self, S., Sparks, R.S.J., Booth, B., & Walker, G.P.L., 1974, The 1973 Heimaey strombolian scoria deposit, Iceland: *Geological Magazine*, 111(06), 539-548.

Stovall, W.K., Houghton, B.F., Gonnermann, H., Fagents, S.A., & Swanson, D.A., 2011, Eruption dynamics of Hawaiian-style fountains: the case study of episode 1 of the Kīlauea Iki 1959 eruption: *Bulletin of volcanology*, 73(5), 511-529.

Zimanowski, B., Büttner, R., Lorenz, V. & Häfele, H.G., 1997, Fragmentation of basaltic

melt in the course of explosive volcanism: *Journal of Geophysical Research - Solid Earth*, 102(B1), 803-814.
